# Supplementary material for: Structural Characteristics and Anticancer Activity of Fucoidan from the Brown Alga Sargassum mcclurei
Source: Mar Drugs. 2013 May 6;11(5):1456–76. doi: 10.3390/md11051456 (PMC3707154; doi:10.3390/md11051456)

## Supplementary Information

**Figure S1.** Anion-exchange chromatography (Macro-Prep DEAE) of crude fucoidan (**SmF**) from *S. mcclurei*.

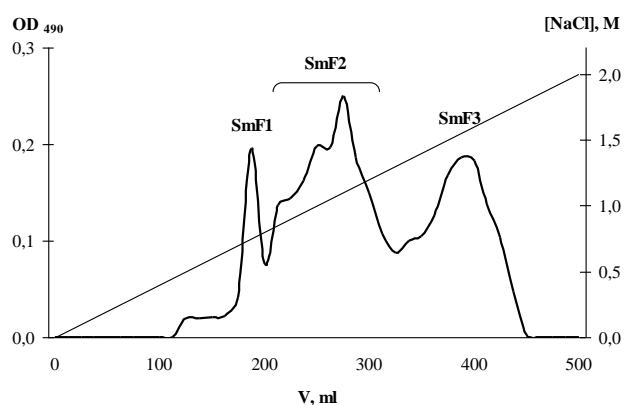

**Figure S2.**  $^{13}\text{C}$  NMR spectra of native **SmF3** (A) and desulfated **SmF3-DS** (B) fucoidans from brown seaweed *S. mcclurei*.

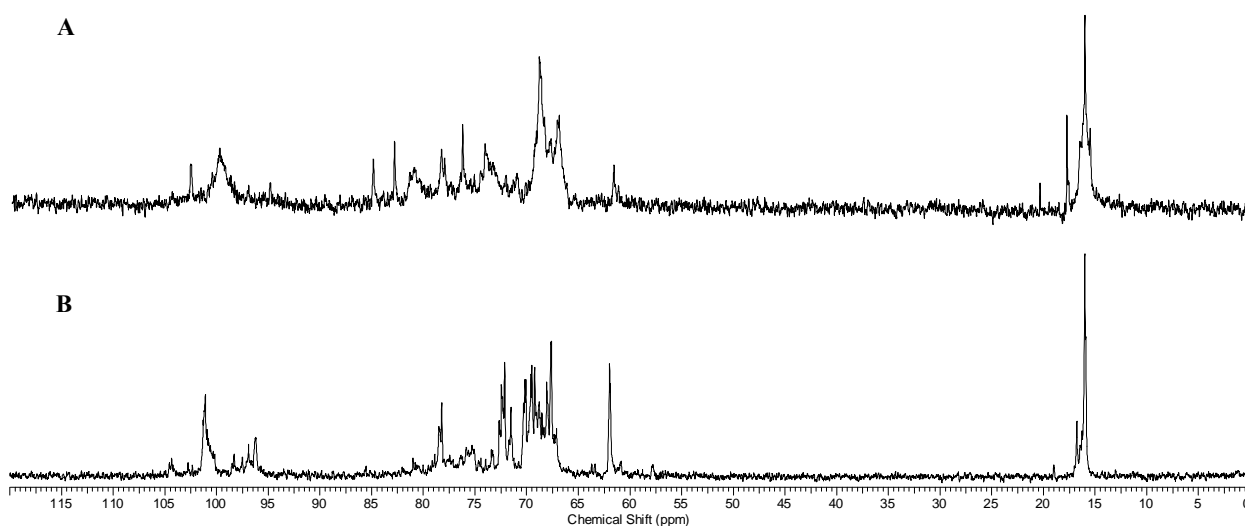

**Figure S3.** Negative-ion ESIMS of the **SmF3** fucoidan after autohydrolysis.

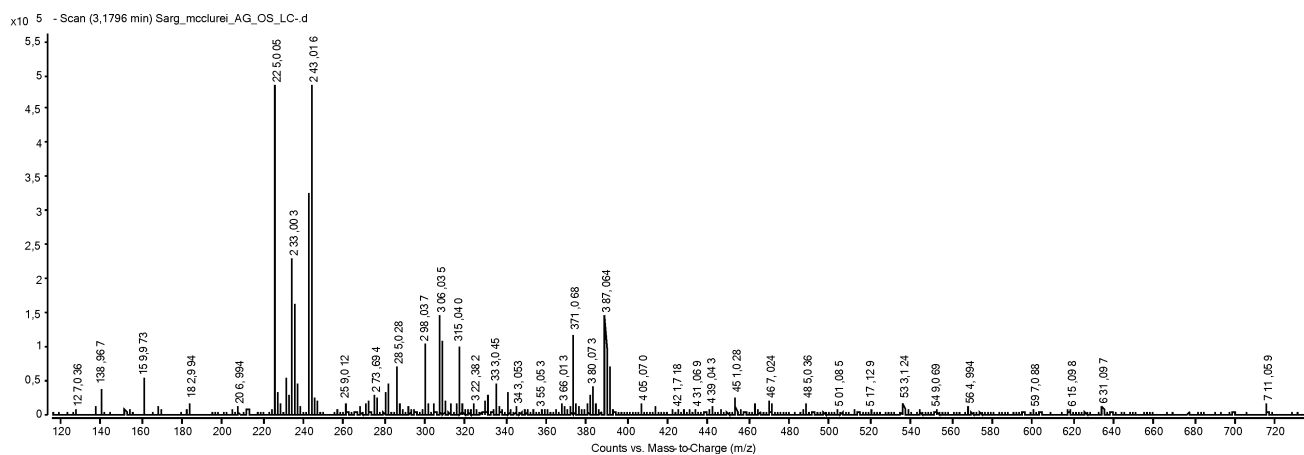

**Figure S4.** Negative-ion tandem CID ESIMS of the ion at  $m/z$  259 (monosulfated Gal).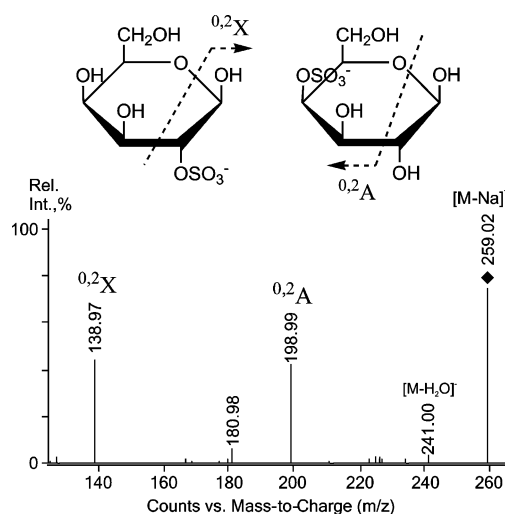**Figure S5.** Cytotoxicity of the fucoidan fractions from the brown alga *Sargassum mcclurei*. DLD-1 cells ( $1.0 \times 10^4$ ) were incubated with investigated fucoidan fractions (200  $\mu\text{g/mL}$ ) for 24/48 h at 37 °C in a 5%  $\text{CO}_2$  incubator. Compound cytotoxicity was estimated using the MTS assay. Data are represented as the mean  $\pm$  SD as determined from triplicate experiments.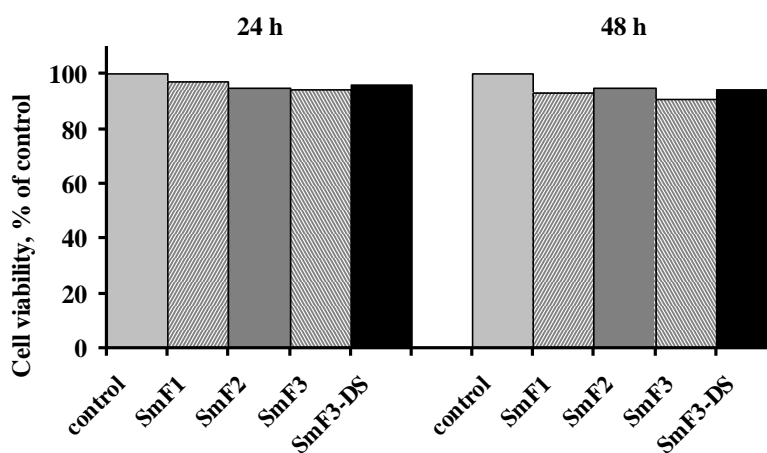

Supplement: Supplementary File 1 — Supplementary Information (PDF, 210 KB) [file marinedrugs-11-01456-s001.pdf]
